# Supplementary material for: The influence of side-chain conformations on the phase behavior of bottlebrush block polymers
Source: Royal Society of Chemistry journal article supplement (doi:10.1039/d0sm00918k), 2020-01-01
Supplement: d0sm00918k1.pdf [file d0sm00918k1.pdf]

# Supporting Information:

## The influence of side-chain conformations on the phase behavior of bottlebrush block polymers

Yuguo Chen<sup>1</sup>, Xinghua Zhang<sup>2,\*</sup> and Ying Jiang<sup>1,3\*</sup>

*<sup>1</sup>School of Chemistry & Key Laboratory of Bio-Inspired Smart Interfacial Science and Technology of Ministry of Education & Center of Soft Matter Physics and Its Applications, Beihang University, Beijing 100191, China*

*<sup>2</sup>School of Science, Beijing Jiaotong University, Beijing 100044, China,*

*<sup>3</sup>Beijing Advanced Innovation Center for Biomedical Engineering, Beihang University, Beijing 100191, China*

E-mail: zhangxh@bjtu.edu.cn; yjiang@buaa.edu.cn

---

\*To whom correspondence should be addressed

## Theoretical formalism of SCFT

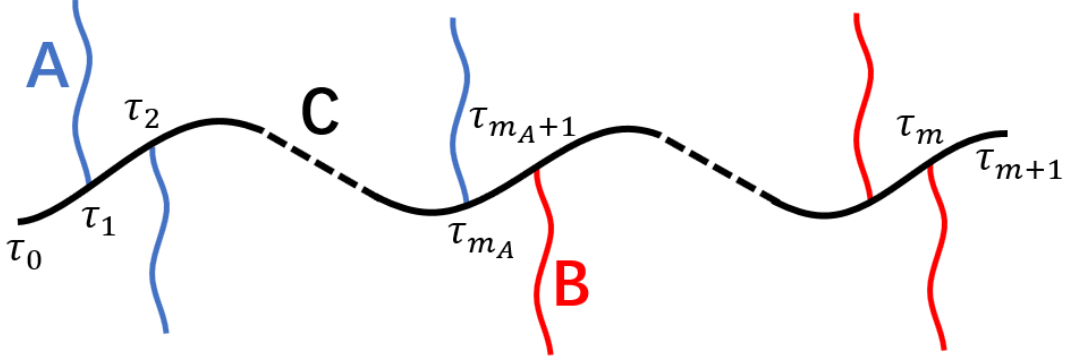

Figure S1: Schematic of the bottlebrush diblock polymer chain composed of side chains A (blue), B (red) and the backbone C (black). The grafting points along the backbone are labelled as  $\tau_i$ ,  $i = 1, 2, 3, \dots, m$  and the free ends are labelled as  $\tau_0$  and  $\tau_{m+1}$ , respectively.

We consider a system of volume  $V$ , which is comprised of  $n$  monodisperse and indistinguishable bottlebrush polymer chains. Each of chain has  $m$  side chains including  $m_A$  A-chains and  $m_B = m - m_A$  B-chains, which uniformly divide the C backbone into  $m + 1$  equal segment, as illustrated in Fig.S1. We assume that each monomer on all blocks shares the same statistical length  $b$  and then occupies the same volume  $\rho_0^{-1}$ . The degree of polymerization of side chains A and B is  $N_A$  and  $N_B$ , while the degree of polymerization of backbone is  $N_C$ . Thus, the summed total segment number of a single bottlebrush polymer is  $N = m_A N_A + m_B N_B + N_C$ . The persistence length for the individual block is  $\lambda_\alpha$ ,  $\alpha = A, B, C$ . The volume fraction for each component is calculated by  $f_A = m_A N_A / N$ ,  $f_B = m_B N_B / N$ , and  $f_C = N_C / N$ . The  $i^{\text{th}}$  grafting point on the backbone is located at  $\tau_i = i \times f_C / (m + 1)$ , where the grafting point index  $i$  ranges from 1 to  $m$ . Then, two remaining free ends of backbone are designated as  $\tau_0$  and  $\tau_{m+1}$ , respectively.

The Helmholtz free energy per chain for multicomponent block copolymers in the mean field approximation<sup>1</sup> can be written as

$$\frac{F}{nk_B T} = -\ln Q + \frac{1}{V} \int d\mathbf{r} \left\{ \sum_{\alpha \neq \beta} N \chi_{\alpha\beta} \phi_\alpha(\mathbf{r}) \phi_\beta(\mathbf{r}) - \sum_{\alpha} \omega_\alpha(\mathbf{r}) \phi_\alpha(\mathbf{r}) - \xi(\mathbf{r}) \left[ 1 - \sum_{\alpha} \phi_\alpha(\mathbf{r}) \right] \right\} \quad (1)$$

The Flory-Huggins parameter  $\chi_{\alpha\beta}$  describes the interaction energy between dissimilar species. The average density for species  $\phi_\alpha(\mathbf{r})$  which is conjugated to the mean field  $\omega_\alpha(\mathbf{r})$  is enforced by the Lagrangian multiplier  $\xi(\mathbf{r})$  due to the incompressibility constraint to  $\sum_\alpha \phi_\alpha(\mathbf{r}) = 1$ .  $k_B$  is the Boltzmann constant and  $T$  is the temperature of the system. For the wormlike chain model used here, the single chain partition function for bottlebrush copolymers can be computed by

$$Q = \frac{1}{4\pi V} \int d\mathbf{r} \int d\mathbf{u} q_C(\mathbf{r}, \mathbf{u}, f_C) \quad (2)$$

The backbone propagator  $q_C(\mathbf{r}, \mathbf{u}, t)$  represents the probability of finding the  $t$  terminal, starting from the free end  $\tau_0$ , which is located at a spatial position specified by  $\mathbf{r}$  and points to a direction specified by the unit vector  $\mathbf{u}$ .

In our model, the backbone is divided into  $m + 1$  blocks. The propagator within the  $i^{\text{th}}$  block is designated as

$$q_C(\mathbf{r}, \mathbf{u}, t) = q_C^{(i)}(\mathbf{r}, \mathbf{u}, t) \quad \text{here, } \tau_i \leq t < \tau_{i+1} \quad i = 0, 1, 2, \dots, m \quad (3)$$

which satisfies the modified diffusion equation<sup>2</sup>

$$\frac{\partial}{\partial t} q_C^{(i)}(\mathbf{r}, \mathbf{u}, t) = \left[ \frac{Nb}{2\lambda_C} \nabla_{\mathbf{u}}^2 - Nb\mathbf{u} \cdot \nabla_{\mathbf{r}} - \omega_C(\mathbf{r}) \right] q_C^{(i)}(\mathbf{r}, \mathbf{u}, t) \quad (4)$$

This equation is subject to the following initial conditions

$$q_C^{(0)}(\mathbf{r}, \mathbf{u}, 0) = 1 \quad (5)$$

and

$$q_C^{(i)}(\mathbf{r}, \mathbf{u}, \tau_i) = q_C^{(i-1)}(\mathbf{r}, \mathbf{u}, \tau_i) \times \frac{1}{4\pi} \int d\mathbf{u}' q_\alpha(\mathbf{r}, \mathbf{u}', t = f_\alpha/m_\alpha) \quad i = 1, 2, \dots, m \quad (6)$$

Herein, we assume that the side chain is grafted on the backbone in an orientation-independent manner. It means that side chains are grafted to the backbone with the equal probability for all

directions. The species index  $\alpha = A, B$  is determined by the component of the side chain grafted at the specific point along the backbone. The propagator for the side chain satisfies

$$\frac{\partial}{\partial t} q_\alpha(\mathbf{r}, \mathbf{u}, t) = \left[ \frac{Nb}{2\lambda_\alpha} \nabla_{\mathbf{u}}^2 - Nb\mathbf{u} \cdot \nabla_{\mathbf{r}} - \omega_\alpha(\mathbf{r}) \right] q_\alpha(\mathbf{r}, \mathbf{u}, t) \quad (7)$$

which is subject to the initial condition  $q_\alpha(\mathbf{r}, \mathbf{u}, 0) = 1$  for the free end.

Because the side chains grafted at two sides of the backbone are distinct, a complementary segment distribution function for the backbone  $\tilde{q}_C^{(i)}(\mathbf{r}, \mathbf{u}, t)$  is also required. It represents the probability of finding the  $t$  terminal belonging to the  $i^{\text{th}}$  block along the backbone, starting from the other free end  $\tau_{m+1}$ , which is at the spatial position  $\mathbf{r}$  and points in a direction specified by the unit vector  $-\mathbf{u}$ . The propagator within the  $(j-1)^{\text{th}}$  block is designated as

$$\tilde{q}_C(\mathbf{r}, \mathbf{u}, t) = \tilde{q}_C^{(j-1)}(\mathbf{r}, \mathbf{u}, t) \quad \text{here, } \tau_{j-1} < t \leq \tau_j \quad j = m+1, m, m-1, \dots, 1 \quad (8)$$

which satisfies the modified diffusion equation

$$\frac{\partial}{\partial t} \tilde{q}_C^{(j-1)}(\mathbf{r}, \mathbf{u}, t) = \left[ -\frac{Nb}{2\lambda_C} \nabla_{\mathbf{u}}^2 - Nb\mathbf{u} \cdot \nabla_{\mathbf{r}} + \omega_C(\mathbf{r}) \right] \tilde{q}_C^{(j-1)}(\mathbf{r}, \mathbf{u}, t) \quad (9)$$

This equation is subject to the following initial conditions

$$\tilde{q}_C^{(m)}(\mathbf{r}, \mathbf{u}, t = f_C) = 1 \quad (10)$$

and

$$\tilde{q}_C^{(j-1)}(\mathbf{r}, \mathbf{u}, \tau_j) = \tilde{q}_C^{(j)}(\mathbf{r}, \mathbf{u}, \tau_j) \times \frac{1}{4\pi} \int d\mathbf{u} q_\alpha(\mathbf{r}, \mathbf{u}, t = f_\alpha/m_\alpha) \quad j = m, m-1, m-2, \dots, 1 \quad (11)$$

where the species index  $\alpha = A, B$  is determined by the component of the side chain grafted at the junction point. Similarly, the other segment distribution function for the side chain propagating

from the  $i^{\text{th}}$  junction point satisfies

$$\frac{\partial}{\partial t} \tilde{q}_\alpha^{(i)}(\mathbf{r}, \mathbf{u}, t) = \left[ -\frac{Nb}{2\lambda_\alpha} \nabla_{\mathbf{u}}^2 - Nb\mathbf{u} \cdot \nabla_{\mathbf{r}} + \omega_\alpha(\mathbf{r}) \right] \tilde{q}_\alpha^{(i)}(\mathbf{r}, \mathbf{u}, t) \quad (12)$$

which is subject to the initial condition

$$\tilde{q}_\alpha^{(i)}(\mathbf{r}, \mathbf{u}, t = f_\alpha/m_\alpha) = \frac{\frac{1}{4\pi} \int d\mathbf{u} q_C^{(i-1)}(\mathbf{r}, \mathbf{u}, t = \tau_i) \tilde{q}_C^{(i)}(\mathbf{r}, \mathbf{u}, t = \tau_i)}{\left[ \frac{1}{4\pi} \int d\mathbf{u} q_\alpha(\mathbf{r}, \mathbf{u}, t = f_\alpha/m_\alpha) \right]^2} \quad (13)$$

Minimization of free energy functional Eq. (1) with respect to functions  $\phi_\alpha(\mathbf{r})$ ,  $\omega_\alpha(\mathbf{r})$ ,  $\xi(\mathbf{r})$ , we directly arrive at a set of saddle-point approximation equations

$$\omega_A(\mathbf{r}) = N\chi_{AB}\phi_B(\mathbf{r}) + N\chi_{AC}\phi_C(\mathbf{r}) + \xi(\mathbf{r}) \quad (14)$$

$$\omega_B(\mathbf{r}) = N\chi_{AB}\phi_A(\mathbf{r}) + N\chi_{BC}\phi_C(\mathbf{r}) + \xi(\mathbf{r}) \quad (15)$$

$$\omega_C(\mathbf{r}) = N\chi_{AC}\phi_A(\mathbf{r}) + N\chi_{BC}\phi_B(\mathbf{r}) + \xi(\mathbf{r}) \quad (16)$$

$$\phi_A(\mathbf{r}) + \phi_B(\mathbf{r}) + \phi_C(\mathbf{r}) = 1 \quad (17)$$

$$\phi_A(\mathbf{r}) = \frac{1}{4\pi Q} \sum_{i=1}^{m_A} \int d\mathbf{u} \int_0^{f_A/m_A} dt q_A(\mathbf{r}, \mathbf{u}, t) \tilde{q}_A^{(i)}(\mathbf{r}, \mathbf{u}, t) \quad (18)$$

$$\phi_B(\mathbf{r}) = \frac{1}{4\pi Q} \sum_{i=m_A+1}^m \int d\mathbf{u} \int_0^{f_B/m_B} dt q_B(\mathbf{r}, \mathbf{u}, t) \tilde{q}_B^{(i)}(\mathbf{r}, \mathbf{u}, t) \quad (19)$$

$$\phi_C(\mathbf{r}) = \frac{1}{4\pi Q} \sum_{i=0}^m \int d\mathbf{u} \int_{\tau_i}^{\tau_{i+1}} dt q_C^{(i)}(\mathbf{r}, \mathbf{u}, t) \tilde{q}_C^{(i)}(\mathbf{r}, \mathbf{u}, t) \quad (20)$$

In the present work, we are mainly interested on the lamellar phase self-assembled by the symmetric bottlebrush copolymers. The system can be simplified further that only one spatial variable  $z$  and one orientational variable  $\theta$  are concerned. Then, Eqs.(4), (7), (9) and (12) can be numerically solved by the pseudo-spectral methods.<sup>1,3</sup> Once the propagators are calculated, we are ready to revise the external fields  $\omega_\alpha$  according to the newly obtained component density. In order

to accelerate the convergence, we use the Anderson mixing scheme,<sup>4,5</sup> which updates the original field by incorporating the results from several preceding iterations. The free energy in Eq. (1) is used to analyze the thermodynamical stability of a specific morphology.

The degree of microphase segregation for bottlebrush copolymers strongly depends on the number of side chains  $m$ . For a fixed Flory-Huggins parameter  $\chi$ , a larger  $m$  commonly results in a stronger phase segregation. In order to estimate the degree of segregation varying with the increase of  $m$ , we set  $N\chi_{AB} = (m/2)(N_A + N_B)\tilde{\chi}_{AB}$ , where  $(N_A + N_B)\tilde{\chi}_{AB} = 15$  corresponding to the intermediate degree of segregation is fixed. On account of the radial stretching of side chains, we assume that the backbone is neutral to side chains, i.e.  $\chi_{AC} = \chi_{BC} = 0$ . Then, the distribution of the backbone is affected by the steric congestion of side chains and the incompressibility constraint, as a consequence of A-B segregation. The present model facilitates us to understand the impact of polymer conformations of the backbone and side chains on the self-assembly behaviors for bottlebrush block polymers.

## References

- (1) Fredrickson, G. H. *The Equilibrium Theory of Inhomogeneous Polymers*; Oxford University Press, 2006.
- (2) Jiang, Y.; Li, S.; Chen, J. Z. *The European Physical Journal E* **2016**, *39*, 91.
- (3) Jiang, Y.; Zhang, W.-Y.; Chen, J. Z. *Y. Phys. Rev. E* **2011**, *84*, 041803.
- (4) Thompson, R. B.; Rasmussen, K. O.; Lookman, T. *The Journal of Chemical Physics* **2004**, *120*, 31–34.
- (5) Matsen, M. W. *The European Physical Journal E* **2009**, *30*, 361.

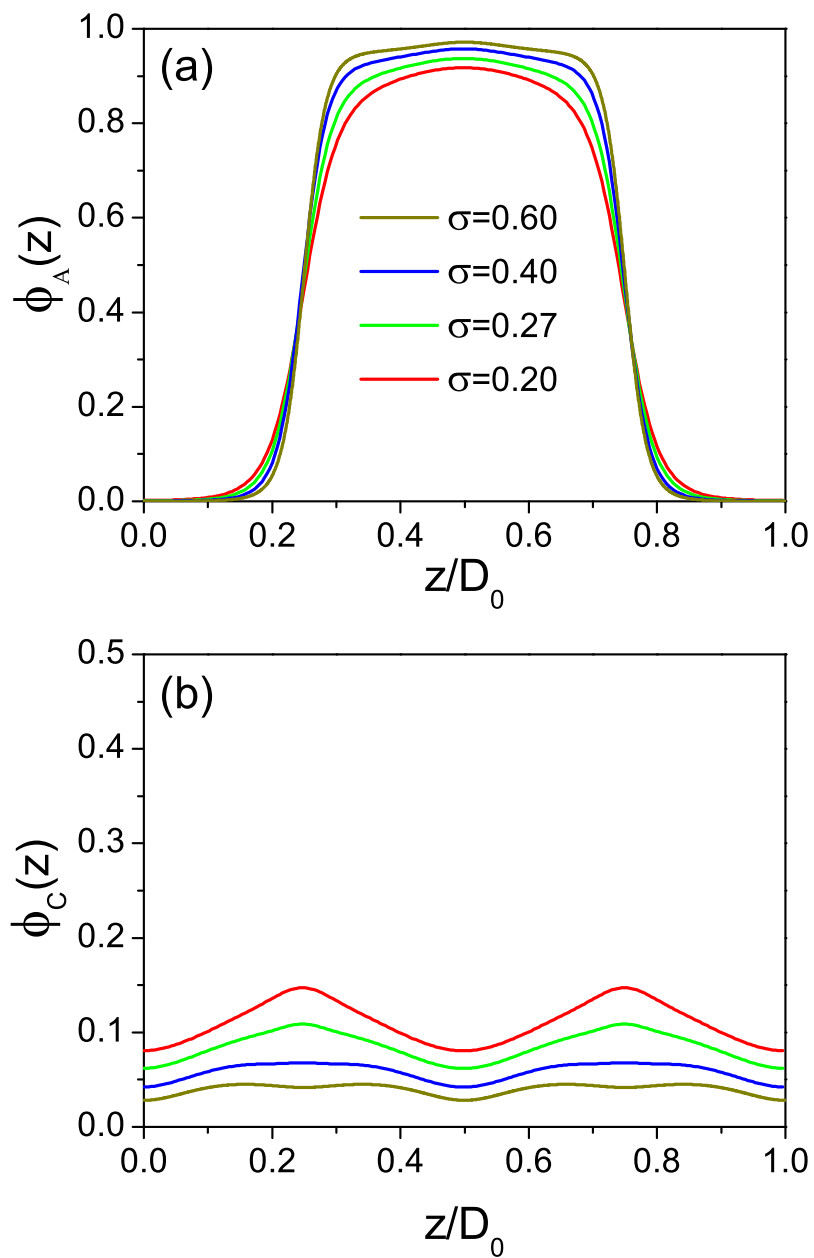

Figure S2: The density profiles for (a) the side chain A and (b) the backbone C in the relative length unit over one domain spacing of lamellar phase with the various grafting density  $\sigma$ . The chain flexibility parameters  $L_A/2\lambda_A = 40$  and  $L_C/2\lambda_C = 7.5$  are used for the block A and the block C, respectively.

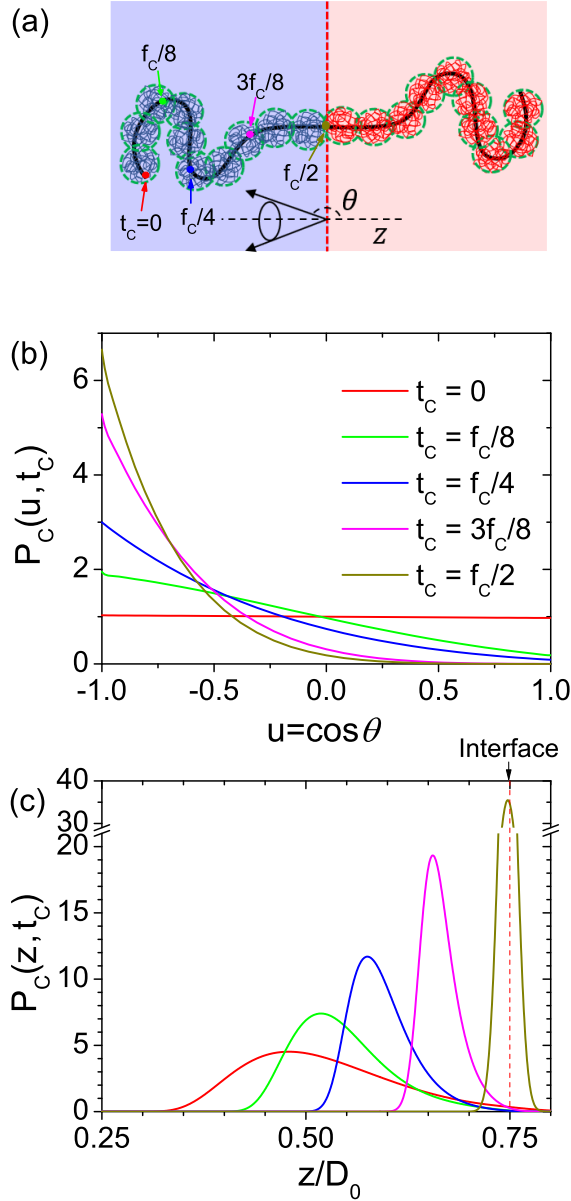

Figure S3: The probability distribution of the backbone segments in lamellae at the given grafting density  $\sigma = 0.53$ . (a) The schematic chain conformation of bottlebrush polymers which are specifically investigated in plots (b) and (c). (b) The orientational probability distribution  $P_C(u, t_C)$  of the backbone monomer labelled by the contour variable  $t_C$ . (c) The positional probability distribution  $P_C(z, t_C)$  of backbone monomers labelled by the contour variable  $t_C$ . The chain flexibility parameters  $L_A/2\lambda_A = 40$  and  $L_C/2\lambda_C = 7.5$  are used for the block A and the block C, respectively. Note, we calculate the probability distribution for the bottlebrush molecule whose junction point is located at one specifically selected interface by imposing a restriction of the interface-location dependence. Thus, herein, the orientation perpendicular to the interface is identified by  $u = -1$ , which is distinguishable from  $u = 1$ .



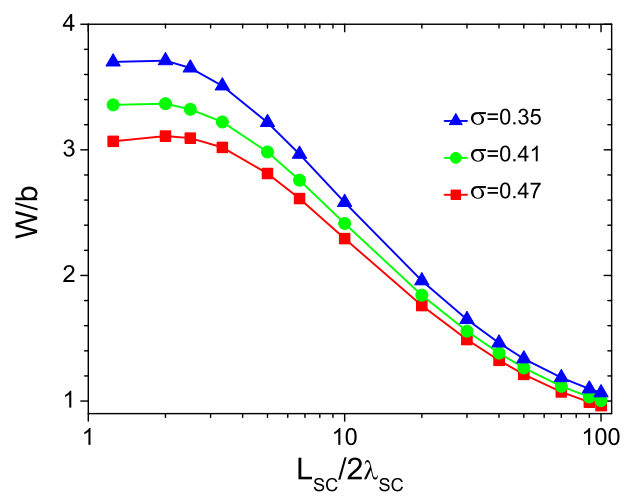

Figure S4: The interfacial width  $W$  in the relative length unit over  $b$  as the function of the chain flexibility parameter  $L_{SC}/2\lambda_{SC}$  of side chains for the given grafting density as labelled in the plot.

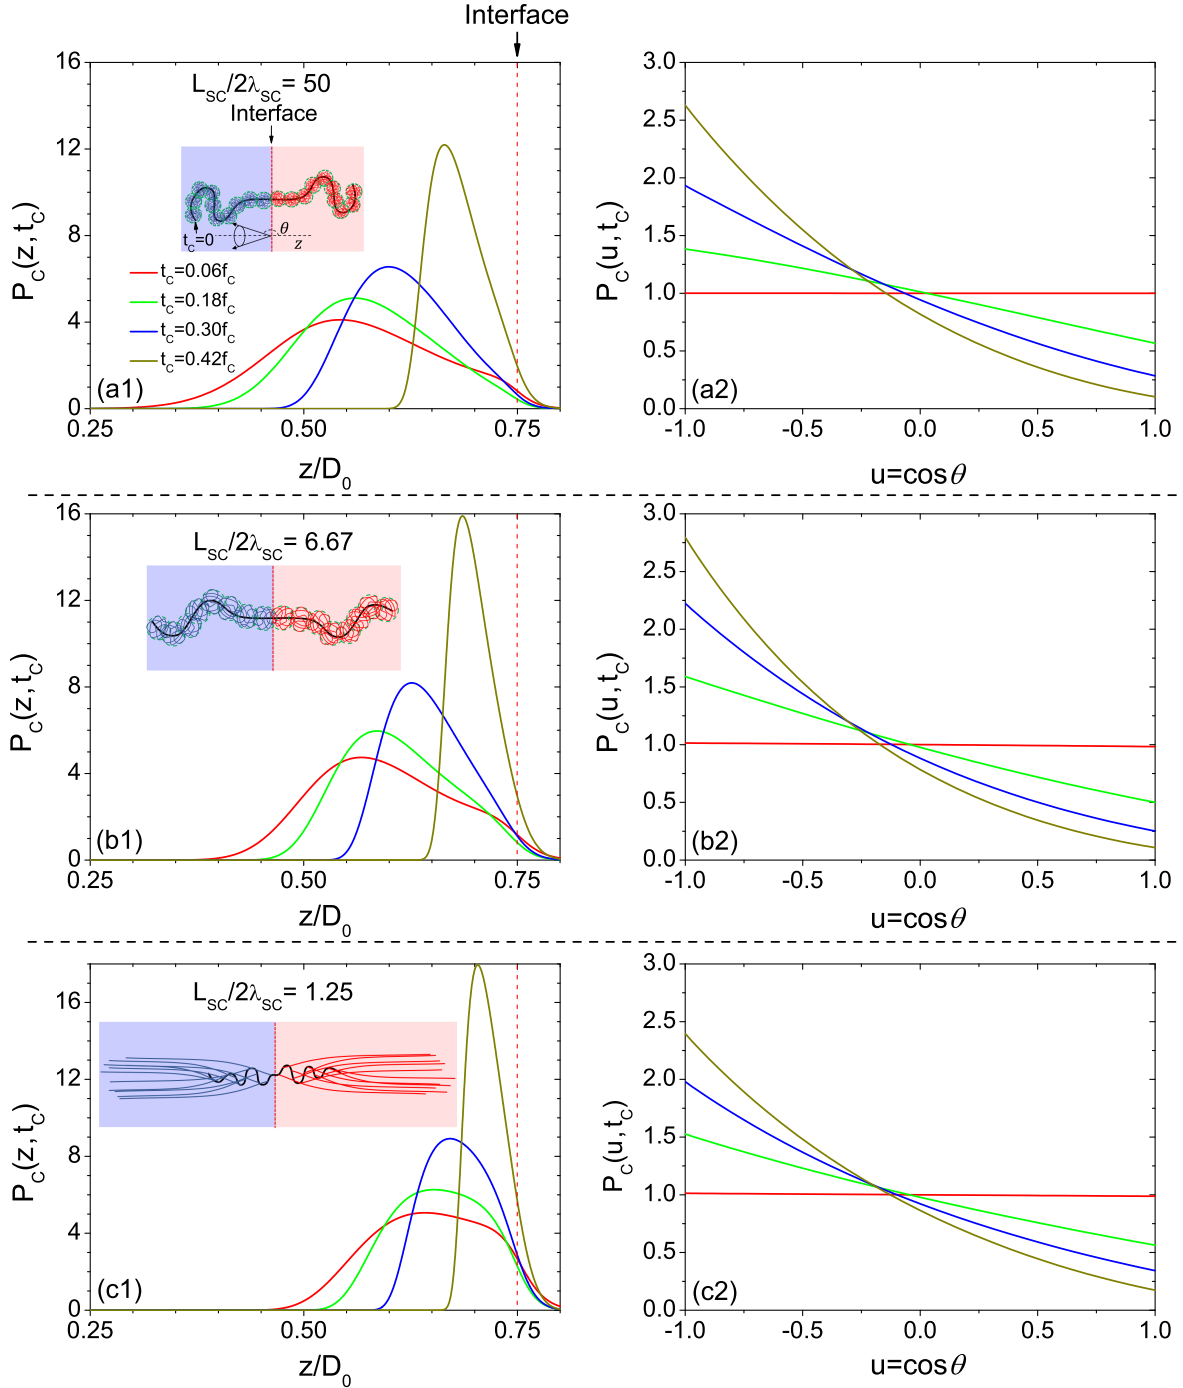

Figure S5: Positional and orientational probability distributions of the backbone segments specifically for three different side-chain conformations parameterized by the flexibility parameter (a)  $L_{SC}/2\lambda_{SC} = 50$ , (b)  $L_{SC}/2\lambda_{SC} = 6.67$ , and (c)  $L_{SC}/2\lambda_{SC} = 1.25$  at the grafting density  $\sigma = 0.47$ . The probability functions follows the same definitions in Fig. S3. The chain flexibility parameter  $L_C/2\lambda_C = 17$  for the backbone is used here.

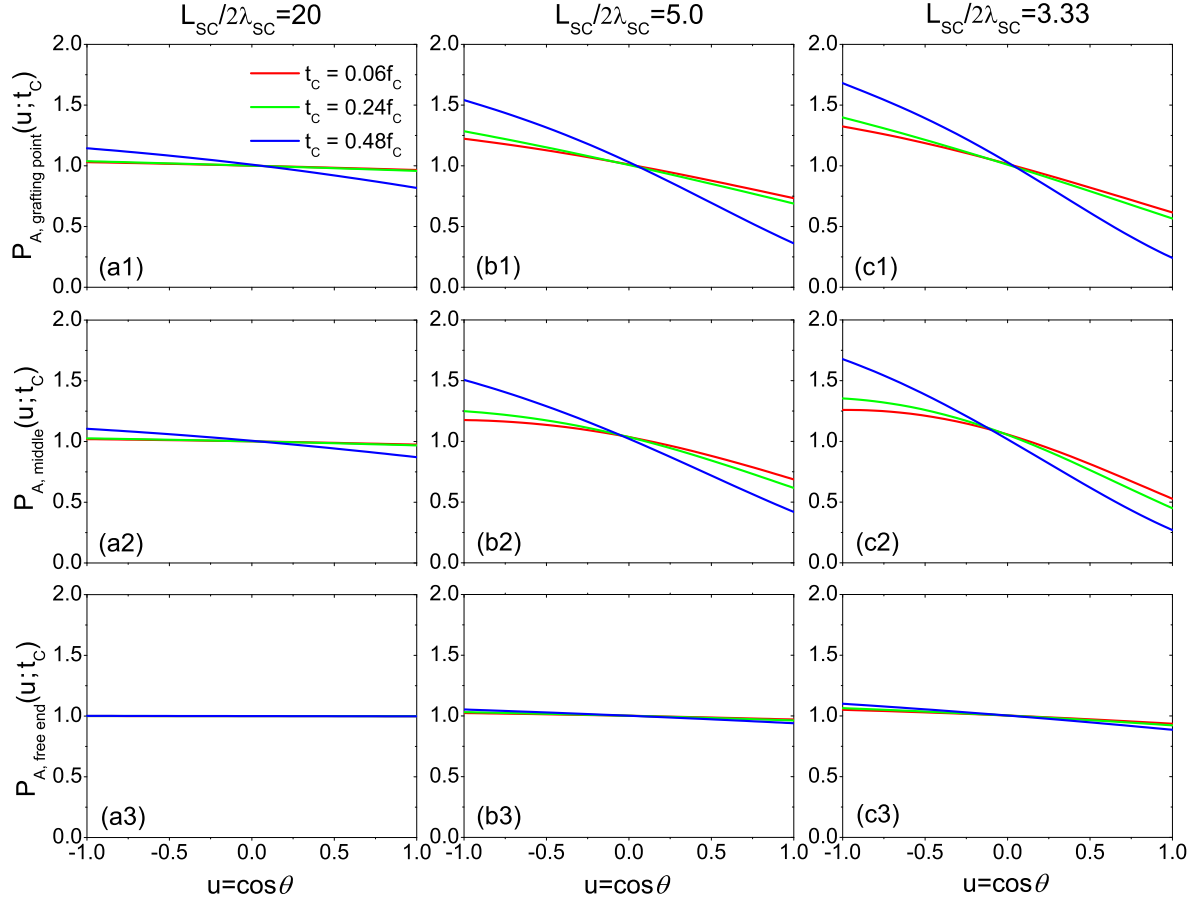

Figure S6: The orientational probability distributions for different segments along the side-chain A with the various side-chain flexibility (a)  $L_{SC}/2\lambda_{SC} = 20$ , (b)  $L_{SC}/2\lambda_{SC} = 5.0$ , and (c)  $L_{SC}/2\lambda_{SC} = 3.33$  at a given grafting density  $\sigma = 0.47$ . The probability function  $P_{A,\gamma}(u; t_C)$  represents the orientational probability of finding the specific segment  $\gamma$  along the side-chain A attached to the backbone segment labelled by the contour variable  $t_C$ . The definition on  $t_C$  is same as the one in Fig. S3a. The side-chain segment index  $\gamma$  denotes the grafting point (1), middle segment (2), and free end (3) of the specified side chain. The orientational variable is defined as  $u = \cos\theta$ , where the angle  $\theta$  is graphically defined in Fig. S3a. Note, herein, the orientation perpendicular to the interface is identified by  $u = -1$ , which is distinguishable from  $u = 1$ , because the restriction of one specifically selected interface is imposed on the computation of  $P_{A,\gamma}(u; t_C)$ .

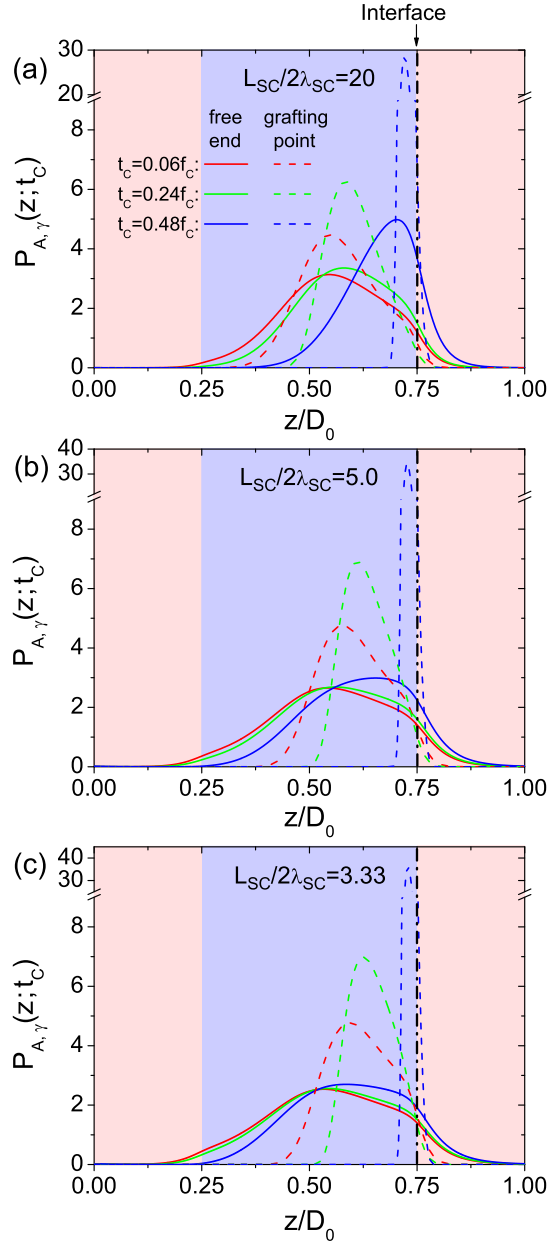

Figure S7: The positional probability distributions for two different ends of one side-chain A with the various side-chain flexibility (a)  $L_{SC}/2\lambda_{SC} = 20$ , (b)  $L_{SC}/2\lambda_{SC} = 5.0$ , and (c)  $L_{SC}/2\lambda_{SC} = 3.33$  at a given grafting density  $\sigma = 0.47$ . The probability function  $P_{A,\gamma}(z; t_C)$  represents the positional probability of finding the specific segment  $\gamma$  along the side-chain A attached to the backbone segment labelled by the contour variable  $t_C$ . The definition on  $t_C$  is same as the one in Fig. S3a. The side-chain segment index  $\gamma$  denotes the free end (solid lines) and the grafting point (dotted lines) of the specified side chain. Note, we calculate  $P_{A,\gamma}(z; t_C)$  for the bottlebrush molecule whose junction point is located at one specifically selected interface as indicated, by imposing a restriction of the interface-location dependence.
